# Supplementary material for: RINGs of good and evil: RING finger ubiquitin ligases at the crossroads of tumour suppression and oncogenesis
Source: Springer Nature journal article supplement (doi:10.1038/nrc3120), 2011-08-24
Supplement: 41568_2011_BFnrc3120_MOESM197_ESM.pdf [file 41568_2011_BFnrc3120_MOESM197_ESM.pdf]

Supplementary Table S1| **Established and Proposed E3s for p53**

| E3                                                         | Comments                                                                                                                                                                                                                                                                                                                                                                                                                                                                                                                                                       | Refs                                           |
|------------------------------------------------------------|----------------------------------------------------------------------------------------------------------------------------------------------------------------------------------------------------------------------------------------------------------------------------------------------------------------------------------------------------------------------------------------------------------------------------------------------------------------------------------------------------------------------------------------------------------------|------------------------------------------------|
| MDM2-MDMX                                                  | Genetically established as critical E3 for p53 (detailed in Review). Other substrates include $\beta$ -arrestin and IGF-1 Receptor                                                                                                                                                                                                                                                                                                                                                                                                                             | 1, 2, See Review for references related to p53 |
| PIRH2                                                      | Initial report indicated binding to central region of p53 (aa 82-292). Structural data shows binding to C-terminal p53 tetramerization domain. Levels correlate with poor survival in hepatocellular carcinoma. There is evidence for targeting of p27 for degradation (see also Table 1 of Review)                                                                                                                                                                                                                                                            | 3-6                                            |
| COP1 (constitutive photomorphogenesis protein 1 homologue) | Originally identified in plant as suppressor of morphogenesis. Protein is overexpressed in adenocarcinomas of breast and ovary. Was recently reported to regulate JUN and ETS families of transcription factors and loss of function towards these transcription factors associated with prostate cancer (see also Table 1 of Review)                                                                                                                                                                                                                          | 7,8                                            |
| Synoviolin (HRD1)                                          | Transmembrane protein of the endoplasmic reticulum. Synoviolin overexpression causal in rheumatoid arthritis. <i>Syvn</i> <sup>-/-</sup> mice are embryonic lethal, however connection of lethality to p53 is not established                                                                                                                                                                                                                                                                                                                                  | 9,10                                           |
| CARP 1 and 2                                               | Can target phospho-Ser20 p53 – unlike Mdm2 and other E3s. Includes N-terminal FYVE domain. CID (caspase interacting domain) and RING finger implicated in p53 binding. CARPs implicated in degradation of procaspase forms of caspases 8 and 10. Targets RIP for degradation in endosomes downregulating NF- $\kappa$ B signaling                                                                                                                                                                                                                              | 11-13                                          |
| TOPORS                                                     | First dual function ubiquitin and SUMO ligase, targets p53 for both modifications. RING finger required for ubiquitination but not sumoylation. Activity increased by phosphorylation N-terminal to RING finger, likely due to enhanced E2 binding. Targeted for degradation by Plk1-mediated phosphorylation. This degradation results in decreased sumoylation but increased ubiquitination of p53. Thus, overall role of Topors-mediated ubiquitination is unclear. Also binds Topoisomerase, loss implicated in retinitis pigmentosa and retinal dystrophy | 14-22                                          |
| SCF <sup><math>\beta</math>-TrCP</sup>                     | Activation of I $\kappa$ B kinase 2, which is essential to the NF- $\kappa$ B signaling pathway, results in phosphorylation of p53 (Ser362 and Ser366) creating a binding site for $\beta$ -TrCP leading to p53 ubiquitination and degradation (see Review for additional information on $\beta$ -TrCP)                                                                                                                                                                                                                                                        | 23                                             |
| SCF <sup>JFK</sup>                                         | Binds p53 between aa113-236. JFK is Kelch-containing F-box protein. Some increase in cancer cells, although causality not established                                                                                                                                                                                                                                                                                                                                                                                                                          | 16, 19, 21,24                                  |

Supplementary Table S1 (cont.)| **Established and Proposed E3s for p53**

| E3      | Comments                                                                                                                                                                                                                                                                                                                                                                                                  | Refs   |
|---------|-----------------------------------------------------------------------------------------------------------------------------------------------------------------------------------------------------------------------------------------------------------------------------------------------------------------------------------------------------------------------------------------------------------|--------|
| TRIM24  | Loss of expression of <i>D. Melanogaster</i> ortholog (Bonus) results in embryonic lethality rescued by <i>p53</i> <sup>-/-</sup> background. RING B-box coiled-coil E3                                                                                                                                                                                                                                   | 25     |
| CUL7    | Binds tetramerization domain of p53 and inhibits p53 activity. E3 function towards p53 not clear. CUL7 and the related protein PARC (RING-IBR-RING) bind p53 directly through their CPH (Cul7, PARC, and HERC2) domains and are known to dimerize (see Table 1 of Review)                                                                                                                                 | 26-30  |
| MKRN1   | Ubiquitinates Lys291 and 292 of human p53 (288, 289 of mouse) near C-terminal region of DNA binding core. Also E3 for hTERT and co-regulator of androgen receptor and retinoic acid receptor. Targets p21 for ubiquitination and degradation. Has complex biology in decreasing p53 – keeping cells alive but preventing cell cycle arrest in response to apoptosis thereby increasing genotoxic stress   | 31, 32 |
| ICP0    | HSV-1 RING finger protein. Associates with and ubiquitinates p53 <i>in vitro</i> and in cells. Not evident whether or not ICP0 results in degradation of p53 or what type of chains are formed                                                                                                                                                                                                            | 33     |
| ARF-BP1 | Large HECT domain E3 also known as HECTH9, MULE and HUWE1 (HECT, UBA, and WWE domain-containing protein 1). Binds to and targets p53 for ubiquitination and degradation. Similar to MDM2, its activity is inhibited by its binding to ARF (see Review). Other substrates include both pro- and anti-apoptotic molecules including MCL-1 and N-MYC                                                         | 34-36  |
| E6-AP   | Founding member of the HECT domain family. Targets p53 for degradation specifically in cells infected with oncogenic isotypes of HPV. HPV E6 from these strains serves as an adaptor between E6-AP and p53. Other substrates include, among others, RING1B component of PRC. Reported to function as a co-activator of nuclear hormone receptors and implicated as pathogenic factor in Angelman Syndrome | 37-40  |

## References

1. Shenoy, S. K., McDonald, P. H., Kohout, T. A. & Lefkowitz, R. J. Regulation of receptor fate by ubiquitination of activated  $\beta_2$ -adrenergic receptor and  $\beta$ -arrestin. *Science* **294**, 1307-1313 (2001).
2. Girnita, L., Girnita, A. & Larsson, O. Mdm2-dependent ubiquitination and degradation of the insulin-like growth factor 1 receptor. *Proc. Natl. Acad. Sci. U S A* **100**, 8247-8252 (2003).
3. Sheng, Y. et al. Molecular basis of Pirh2-mediated p53 ubiquitylation. *Nat. Struct. Mol. Biol.* **15**, 1334-1342 (2008).
4. Wang, X. M., Yang, L. Y., Guo, L., Fan, C. & Wu, F. p53-induced RING-H2 protein, a novel marker for poor survival in hepatocellular carcinoma after hepatic resection. *Cancer* **115**, 4554-4563 (2009).
5. Leng, R. P. et al. Pirh2, a p53-induced ubiquitin-protein ligase, promotes p53 degradation. *Cell* **112**, 779-791 (2003).
6. Hattori, T. et al. Pirh2 promotes ubiquitin-dependent degradation of the cyclin-dependent kinase inhibitor p27Kip1. *Cancer Res.* **67**, 10789-10795 (2007).
7. Dornan, D. et al. The ubiquitin ligase COP1 is a critical negative regulator of p53. *Nature* **429**, 86-92 (2004).
8. Dornan, D. et al. COP1, the negative regulator of p53, is overexpressed in breast and ovarian adenocarcinomas. *Cancer Res.* **64**, 7226-7230 (2004).
9. Yamasaki, S. et al. Cytoplasmic destruction of p53 by the endoplasmic reticulum-resident ubiquitin ligase 'Synoviolin'. *EMBO J.* **26**, 113-122 (2007).
10. Amano, T. et al. Synoviolin/Hrd1, an E3 ubiquitin ligase, as a novel pathogenic factor for arthropathy. *Genes Dev.* **17**, 2436-2449 (2003).
11. Yang, W. et al. CARPs are ubiquitin ligases that promote MDM2-independent p53 and phospho-p53ser20 degradation. *J. Biol. Chem.* **282**, 3273-3281 (2007).
12. McDonald, E. R. r. & El-Deiry, W. S. Suppression of caspase-8- and -10-associated RING proteins results in sensitization to death ligands and inhibition of tumor cell growth. *Proc. Natl. Acad. Sci. U S A* **101**, 6170-6175 (2004).
13. Liao, W. et al. CARP-2 is an endosome-associated ubiquitin ligase for RIP and regulates TNF-induced NF- $\kappa$ B activation. *Curr. Biol.* **18**, 641-649 (2008).
14. Rajendra, R. et al. Topors functions as an E3 ubiquitin ligase with specific E2 enzymes and ubiquitinates p53. *J. Biol. Chem.* **279**, 36440-36444 (2004).
15. Secombe, J. & Parkhurst, S. M. Drosophila Topors is a RING finger-containing protein that functions as a ubiquitin-protein isopeptide ligase for the hairy basic helix-loop-helix repressor protein. *J. Biol. Chem.* **279**, 17126-17133 (2004).
16. Weger, S., Hammer, E. & Heilbronn, R. Topors acts as a SUMO-1 E3 ligase for p53 in vitro and in vivo. *FEBS Lett.* **579**, 5007-5012 (2005).
17. Hammer, E., Heilbronn, R. & Weger, S. The E3 ligase Topors induces the accumulation of polysumoylated forms of DNA topoisomerase I in vitro and in vivo. *FEBS Lett.* **581**, 5418-5424 (2007).
18. Pungalaya, P. et al. TOPORS functions as a SUMO-1 E3 ligase for chromatin-modifying proteins. *J Proteome Res* **6**, 3918-3923 (2007).
19. Park, H. J. et al. Identification of phosphorylation sites of TOPORS and a role for serine 98 in the regulation of ubiquitin but not SUMO E3 ligase activity. *Biochemistry* **47**, 13887-13896 (2008).
20. Yang, X. et al. Plk1-mediated phosphorylation of Topors regulates p53 stability. *J. Biol. Chem.* **284**, 18588-18592 (2009).
21. Schob, C. et al. Mutations in TOPORS: a rare cause of autosomal dominant retinitis pigmentosa in continental Europe? *Ophthalmic Genet* **30**, 96-98 (2009).

22. Selmer, K. K. et al. Autosomal dominant pericentral retinal dystrophy caused by a novel missense mutation in the TOPORS gene. *Acta Ophthalmol* **88**, 323-328 (2010).
23. Xia, Y. et al. Phosphorylation of p53 by I $\kappa$ B kinase 2 promotes its degradation by  $\beta$ -TrCP. *Proc. Natl. Acad. Sci. U S A* **106**, 2629-2634 (2009).
24. Sun, L. et al. JFK, a Kelch domain-containing F-box protein, links the SCF complex to p53 regulation. *Proc. Natl. Acad. Sci. U S A* **106**, 10195-10200 (2009).
25. Allton, K. et al. Trim24 targets endogenous p53 for degradation. *Proc. Natl. Acad. Sci. U S A* **106**, 11612-11616 (2009).
26. Kaustov, L. et al. The conserved CPH domains of Cul7 and PARC are protein-protein interaction modules that bind the tetramerization domain of p53. *J. Biol. Chem.* **282**, 11300-11307 (2007).
27. Jung, P. et al. Induction of cullin 7 by DNA damage attenuates p53 function. *Proc. Natl. Acad. Sci. U S A* **104**, 11388-11393 (2007).
28. Andrews, P., He, Y. J. & Xiong, Y. Cytoplasmic localized ubiquitin ligase cullin 7 binds to p53 and promotes cell growth by antagonizing p53 function. *Oncogene* **25**, 4534-4548 (2006).
29. Skaar, J. R. et al. PARC and CUL7 form atypical cullin RING ligase complexes. *Cancer Res.* **67**, 2006-2014 (2007).
30. Sarikas, A., Xu, X., Field, L. J. & Pan, Z. Q. The cullin7 E3 ubiquitin ligase: a novel player in growth control. *Cell Cycle* **7**, 3154-3161 (2008).
31. Kim, J. H. et al. Ubiquitin ligase MKRN1 modulates telomere length homeostasis through a proteolysis of hTERT. *Genes Dev.* **19**, 776-781 (2005).
32. Lee, E. W. et al. Differential regulation of p53 and p21 by MKRN1 E3 ligase controls cell cycle arrest and apoptosis. *EMBO J.* **28**, 2100-2113 (2009).
33. Boutell, C. & Everett, R. D. The herpes simplex virus type 1 (HSV-1) regulatory protein ICP0 interacts with and Ubiquitinates p53. *J. Biol. Chem.* **278**, 36596-36602 (2003).
34. Chen, D. et al. ARF-BP1/Mule is a critical mediator of the ARF tumor suppressor. *Cell* **121**, 1071-1083 (2005).
35. Zhong, Q., Gao, W., Du, F. & Wang, X. Mule/ARF-BP1, a BH3-only E3 ubiquitin ligase, catalyzes the polyubiquitination of Mcl-1 and regulates apoptosis. *Cell* **121**, 1085-1095 (2005).
36. Zhao, X. et al. The HECT-domain ubiquitin ligase Huwe1 controls neural differentiation and proliferation by destabilizing the N-Myc oncoprotein. *Nat. Cell Biol.* **10**, 643-653 (2008).
37. Scheffner, M., Huibregtse, J. M., Vierstra, R. D. & Howley, P. M. The HPV-16 E6 and E6-AP complex functions as a ubiquitin-protein ligase in the ubiquitination of p53. *Cell* **75**, 495-505 (1993).
38. Zaaroor-Regev, D. et al. Regulation of the polycomb protein Ring1B by self-ubiquitination or by E6-AP may have implications to the pathogenesis of Angelman syndrome. *Proc. Natl. Acad. Sci. U S A* **107**, 6788-6793 (2010).
39. Kishino, T., Lalande, M. & Wagstaff, J. UBE3A/E6-AP mutations cause Angelman syndrome. *Nat. Genet.* **15**, 70-73 (1997).
40. Nawaz, Z. et al. The Angelman syndrome-associated protein, E6-AP, is a coactivator for the nuclear hormone receptor superfamily. *Mol. Cell. Biol.* **19**, 1182-1189 (1999).
