# Supplementary material for: RINGs of good and evil: RING finger ubiquitin ligases at the crossroads of tumour suppression and oncogenesis
Source: Springer Nature journal article supplement (doi:10.1038/nrc3120), 2011-08-24
Supplement: 41568_2011_BFnrc3120_MOESM198_ESM.pdf [file 41568_2011_BFnrc3120_MOESM198_ESM.pdf]

Supplementary Table S2| **RING Finger E3s Implicated in Regulating Cell Cycle in Response to DNA Damage**

| E3                    | Substrates           | Comments                                                                                                                                                | Refs               |
|-----------------------|----------------------|---------------------------------------------------------------------------------------------------------------------------------------------------------|--------------------|
| SCF <sup>β-TrCP</sup> | Cdc25, Claspin, Wee1 | Substrates targeted to both initiate arrest in response to DNA damage (Cdc25) and to allow for progression from G2 through M phase (Claspin, Wee1)      | 1-6, reviewed in 7 |
| APC/C <sup>Cdh1</sup> | Plk1                 | Plk1 targeted in response to DNA damage                                                                                                                 | 8, reviewed in 7   |
| SCF <sup>Fbx6</sup>   | Chk1                 | Chk1 ubiquitination believed to relieve S phase checkpoint                                                                                              | 9                  |
| CRL4 <sup>Cdt2</sup>  | Cdt1, p21, Set8      | CRL4 <sup>Cdt2</sup> targets substrates following UV irradiation: Cdt1 (replication licensing factor), p21 (Cdk inhibitor), Set8 (H4 methyltransferase) | 10-16              |

## References

1. Busino, L. et al. Degradation of Cdc25A by  $\beta$ -TrCP during S phase and in response to DNA damage. *Nature* **426**, 87-91 (2003).
2. Jin, J. et al. SCF <sup>$\beta$ -TRCP</sup> links Chk1 signaling to degradation of the Cdc25A protein phosphatase. *Genes Dev.* **17**, 3062-3074 (2003).
3. Watanabe, N. et al. M-phase kinases induce phospho-dependent ubiquitination of somatic Wee1 by SCF <sup>$\beta$ -TrCP</sup>. *Proc. Natl. Acad. Sci. U S A* **101**, 4419-4424 (2004).
4. Mailand, N., Bekker-Jensen, S., Bartek, J. & Lukas, J. Destruction of Claspin by SCF <sup>$\beta$ -TRCP</sup> restrains Chk1 activation and facilitates recovery from genotoxic stress. *Mol. Cell* **23**, 307-318 (2006).
5. Mamely, I. et al. Polo-like kinase-1 controls proteasome-dependent degradation of Claspin during checkpoint recovery. *Curr. Biol.* **16**, 1950-1955 (2006).
6. Peschiaroli, A. et al. SCF SCF <sup>$\beta$ -TRCP</sup> -mediated degradation of Claspin regulates recovery from the DNA replication checkpoint response. *Mol. Cell* **23**, 319-329 (2006).
7. Skaar, J. R. & Pagano, M. Control of cell growth by the SCF and APC/C ubiquitin ligases. *Curr. Opin. Cell Biol.* **21**, 816-824 (2009).
8. Bassermann, F. et al. The Cdc14B-Cdh1-Plk1 axis controls the G2 DNA-damage-response checkpoint. *Cell* **134**, 256-267 (2008).
9. Zhang, Y. W. et al. The F box protein Fbx6 regulates Chk1 stability and cellular sensitivity to replication stress. *Mol. Cell* **35**, 442-453 (2009).
10. Centore, R. C. et al. CRL4(Cdt2)-mediated destruction of the histone methyltransferase Set8 prevents premature chromatin compaction in S phase. *Mol. Cell* **40**, 22-33 (2010).
11. Jorgensen, S. et al. SET8 is degraded via PCNA-coupled CRL4(CDT2) ubiquitylation in S phase and after UV irradiation. *J. Cell Biol.* **192**, 43-54 (2011).
12. Abbas, T. et al. PCNA-dependent regulation of p21 ubiquitylation and degradation via the CRL4Cdt2 ubiquitin ligase complex. *Genes Dev.* **22**, 2496-2506 (2008).
13. Kim, Y., Starostina, N. G. & Kipreos, E. T. The CRL4Cdt2 ubiquitin ligase targets the degradation of p21Cip1 to control replication licensing. *Genes Dev.* **22**, 2507-2519 (2008).
14. Higa, L. A. et al. L2DTL/CDT2 interacts with the CUL4/DDB1 complex and PCNA and regulates CDT1 proteolysis in response to DNA damage. *Cell Cycle* **5**, 1675-1680 (2006).
15. Jin, J., Arias, E. E., Chen, J., Harper, J. W. & Walter, J. C. A family of diverse Cul4-Ddb1-interacting proteins includes Cdt2, which is required for S phase destruction of the replication factor Cdt1. *Mol. Cell* **23**, 709-721 (2006).
16. Ralph, E., Boye, E. & Kearsley, S. E. DNA damage induces Cdt1 proteolysis in fission yeast through a pathway dependent on Cdt2 and Ddb1. *EMBO Rep.* **7**, 1134-1139 (2006).
