# Supplementary material for: RINGs of good and evil: RING finger ubiquitin ligases at the crossroads of tumour suppression and oncogenesis
Source: Springer Nature journal article supplement (doi:10.1038/nrc3120), 2011-08-24
Supplement: 41568_2011_BFnrc3120_MOESM199_ESM.pdf [file 41568_2011_BFnrc3120_MOESM199_ESM.pdf]

Supplementary Table S3| **RING E3s Implicated in DNA repair\***

| E3                    | Target    | Type of ubiquitination              | E3 function                                                              | Comments                                                                                                                                                                                                                                                                                     | Refs                  |
|-----------------------|-----------|-------------------------------------|--------------------------------------------------------------------------|----------------------------------------------------------------------------------------------------------------------------------------------------------------------------------------------------------------------------------------------------------------------------------------------|-----------------------|
| Rad18                 | PCNA      | Mono on Lys164 of PCNA              | Translesional DNA repair (error prone) when not coupled to Rad5 (below). |                                                                                                                                                                                                                                                                                              | 1, 2, reviewed in 3   |
| Rad5                  | PCNA      | Lys63 chains after priming by Rad18 | Error free DNA damage tolerance (DDT)                                    |                                                                                                                                                                                                                                                                                              | 2, reviewed in 3      |
| SCF <sup>β-TrCP</sup> | FANCM     | Lys48 chains                        | Prevents activation of FANC core E3                                      | Degraded in mitosis, prevents inappropriate activation of FANC complex and chromosomal abnormalities (see Review for additional information)                                                                                                                                                 | 4, reviewed in 5      |
| RNF8                  | H2A, H2B  | Mono, Lys63 chains                  | DNA double strand break repair                                           | Recruited by phosphorylated H2AX (γH2AX)                                                                                                                                                                                                                                                     | 6-12, reviewed in 13  |
| RNF168                | H2A, H2AX | Lys63 chains                        | DNA double strand break repair                                           | Recruited through MIU-type ubiquitin binding domains to RNF8-generated Lys63 chains. Mutations causative for RIDDLE syndrome, an immunodeficiency disorder characterized by hypersensitivity to DNA damaging agents and by defects in recruitment of p53BP1 and BRCA1 to sites of DNA damage | 14-16, reviewed in 13 |
| CRL4 <sup>DDB2</sup>  | H2A       | mono                                | Nuclear excision repair in response to UV radiation                      | Mutations in DDB2 cause Xeroderma Pigmentosum group E skin cancer susceptibility phenotype.                                                                                                                                                                                                  | 17, 18                |
| RING2 (RNF2)          | H2A       | mono                                | Nuclear excision repair in response to UV irradiation                    | Functions in a complex with the RING finger protein Bmi1                                                                                                                                                                                                                                     | 19, 20                |

\* See Review for discussions of BRCA1 and FANC core E3 complex

## References

1. Hoege, C., Pfander, B., Moldovan, G. L., Pyrowolakis, G. & Jentsch, S. RAD6-dependent DNA repair is linked to modification of PCNA by ubiquitin and SUMO. *Nature* **419**, 135-141 (2002).
2. Ulrich, H. D. & Jentsch, S. Two RING finger proteins mediate cooperation between ubiquitin-conjugating enzymes in DNA repair. *EMBO J.* **19**, 3388-3397 (2000).
3. Ulrich, H. D. Timing and spacing of ubiquitin-dependent DNA damage bypass. *FEBS Lett.* (2011).
4. Kee, Y., Kim, J. M. & D'Andrea, A. D. Regulated degradation of FANCM in the Fanconi anemia pathway during mitosis. *Genes Dev.* **23**, 555-560 (2009).
5. Moldovan, G. L. & D'Andrea, A. D. How the fanconi anemia pathway guards the genome. *Annu. Rev. Genet.* **43**, 223-249 (2009).
6. Plans, V. et al. The RING finger protein RNF8 recruits UBC13 for lysine 63-based self polyubiquitylation. *J. Cell. Biochem.* **97**, 572-582 (2006).
7. Mailand, N. et al. RNF8 ubiquitylates histones at DNA double-strand breaks and promotes assembly of repair proteins. *Cell* **131**, 887-900 (2007).
8. Huen, M. S. et al. RNF8 transduces the DNA-damage signal via histone ubiquitylation and checkpoint protein assembly. *Cell* **131**, 901-914 (2007).
9. Kolas, N. K. et al. Orchestration of the DNA-damage response by the RNF8 ubiquitin ligase. *Science* **318**, 1637-1640 (2007).
10. Wang, B. & Elledge, S. J. Ubc13/Rnf8 ubiquitin ligases control foci formation of the Rap80/Abraxas/Brc1/Brcc36 complex in response to DNA damage. *Proc. Natl. Acad. Sci. U S A* **104**, 20759-20763 (2007).
11. Sakasai, R. & Tibbetts, R. RNF8-dependent and RNF8-independent regulation of 53BP1 in response to DNA damage. *J. Biol. Chem.* **283**, 13549-13555 (2008).
12. Wu, J. et al. Histone ubiquitination associates with BRCA1-dependent DNA damage response. *Mol. Cell. Biol.* **29**, 849-860 (2009).
13. Messick, T. E. & Greenberg, R. A. The ubiquitin landscape at DNA double-strand breaks. *J. Cell Biol.* **187**, 319-326 (2009).
14. Pinato, S. et al. RNF168, a new RING finger, MIU-containing protein that modifies chromatin by ubiquitination of histones H2A and H2AX. *BMC Mol Biol* **10**, 55 (2009).
15. Stewart, G. S. et al. The RIDDLE syndrome protein mediates a ubiquitin-dependent signaling cascade at sites of DNA damage. *Cell* **136**, 420-434 (2009).
16. Stewart, G. S. Solving the RIDDLE of 53BP1 recruitment to sites of damage. *Cell Cycle* **8**, 1532-1538 (2009).
17. Guerrero-Santoro, J. et al. The cullin 4B-based UV-damaged DNA-binding protein ligase binds to UV-damaged chromatin and ubiquitinates histone H2A. *Cancer Res.* **68**, 5014-5022 (2008).
18. Nichols, A. F., Ong, P. & Linn, S. Mutations specific to the xeroderma pigmentosum group E Ddb- phenotype. *J. Biol. Chem.* **271**, 24317-24320 (1996).
19. Bergink, S. et al. DNA damage triggers nucleotide excision repair-dependent monoubiquitylation of histone H2A. *Genes Dev.* **20**, 1343-1352 (2006).
20. Ismail, I. H., Andrin, C., McDonald, D. & Hendzel, M. J. BMI1-mediated histone ubiquitylation promotes DNA double-strand break repair. *J. Cell Biol.* **191**, 45-60 (2010).
